# Supplementary material
Source: PubMed Central journal article supplement (PMC2646118)
Supplement: NIHMS86258-supplement-1_si_001.pdf [file NIHMS86258-supplement-1_si_001.pdf]

## Supporting Information

# Most Efficient Cocaine Hydrolase Designed by Virtual Screening of Transition States

Fang Zheng,<sup>1</sup> Wenchao Yang,<sup>1</sup> Mei-Chuan Ko,<sup>2</sup> Junjun Liu,<sup>1</sup> Hoon Cho,<sup>1</sup> Daquan Gao,<sup>1</sup> Min Tong,<sup>1</sup> Hsin-Hsiung Tai,<sup>1</sup> James H. Woods,<sup>2</sup> and Chang-Guo Zhan<sup>1,\*</sup>

<sup>1</sup>Department of Pharmaceutical Sciences, College of Pharmacy, University of Kentucky, 725 Rose Street, Lexington, KY 40536

<sup>2</sup>Department of Pharmacology, University of Michigan Medical School, 1301 Medical Sciences Research Building III, Ann Arbor, MI 48109

**Supporting Information Available.** Complete citation of references 30 and 33. This material is available free of charge *via* the Internet at <http://pubs.acs.org>.

### Complete Citation of References 30 and 33

**Ref.30:** Case, D.A.; Pearlman, D.A.; Caldwell, J.W.; Cheatham III, T.E.; Wang, J.; Ross, W.S.; Simmerling, C.L.; Darden, T.A.; Merz, K.M.; Stanton, R.V.; Cheng, A.L.; Vincent, J.J.; Crowley, M.; Tsui, V.; Gohlke, H.; Radmer, R.J.; Duan, Y.; Pitera, J.; Massova, I.; Seibel, G.L.; Singh, U.C.; Weiner, P.K.; Kollman, P.A. *Amber7*, University of California, San Francisco, 2002.

---

\* Corresponding author. E-mail: [zhan@uky.edu](mailto:zhan@uky.edu)

**Ref.33:** Frisch, M. J.; Trucks, G. W.; Schlegel, H. B.; Scuseria, G. E.; Robb, M. A.; Cheeseman, J. R.; Montgomery, J. A., Jr.; Vreven, T.; Kudin, K. N.; Burant, J. C.; Millam, J. M.; Iyengar, S. S.; Tomasi, J.; Barone, V.; Mennucci, B.; Cossi, M.; Scalmani, G.; Rega, N.; Petersson, G. A.; Nakatsuji, H.; Hada, M.; Ehara, M.; Toyota, K.; Fukuda, R.; Hasegawa, J.; Ishida, M.; Nakajima, T.; Honda, Y.; Kitao, O.; Nakai, H.; Klene, M.; Li, X.; Knox, J. E.; Hratchian, H. P.; Cross, J. B.; Adamo, C.; Jaramillo, J.; Gomperts, R.; Stratmann, R. E.; Yazyev, O.; Austin, A. J.; Cammi, R.; Pomelli, C.; Ochterski, J. W.; Ayala, P. Y.; Morokuma, K.; Voth, G. A.; Salvador, P.; Dannenberg, J. J.; Zakrzewski, V. G.; Dapprich, S.; Daniels, A. D.; Strain, M. C.; Farkas, O.; Malick, D. K.; Rabuck, A. D.; Raghavachari, K.; Foresman, J. B.; Ortiz, J. V.; Cui, Q.; Baboul, A. G.; Clifford, S.; Cioslowski, J.; Stefanov, B. B.; Liu, G.; Liashenko, A.; Piskorz, P.; Komaromi, I.; Martin, R. L.; Fox, D. J.; Keith, T.; Al-Laham, M. A.; Peng, C. Y.; Nanayakkara, A.; Challacombe, M.; Gill, P. M. W.; Johnson, B.; Chen, W.; Wong, M. W.; Gonzalez, C.; Pople, J. A. *Gaussian 03, Revision A.1*, Gaussian, Pittsburgh, PA, 2003.
